# Supplementary material for: Distinctive Feature of Microbial Communities and Bacterial Functional Profiles in Tricholoma matsutake Dominant Soil
Source: PLOS journal article supplement (doi:10.1371/journal.pone.0168573), 2016-12-15

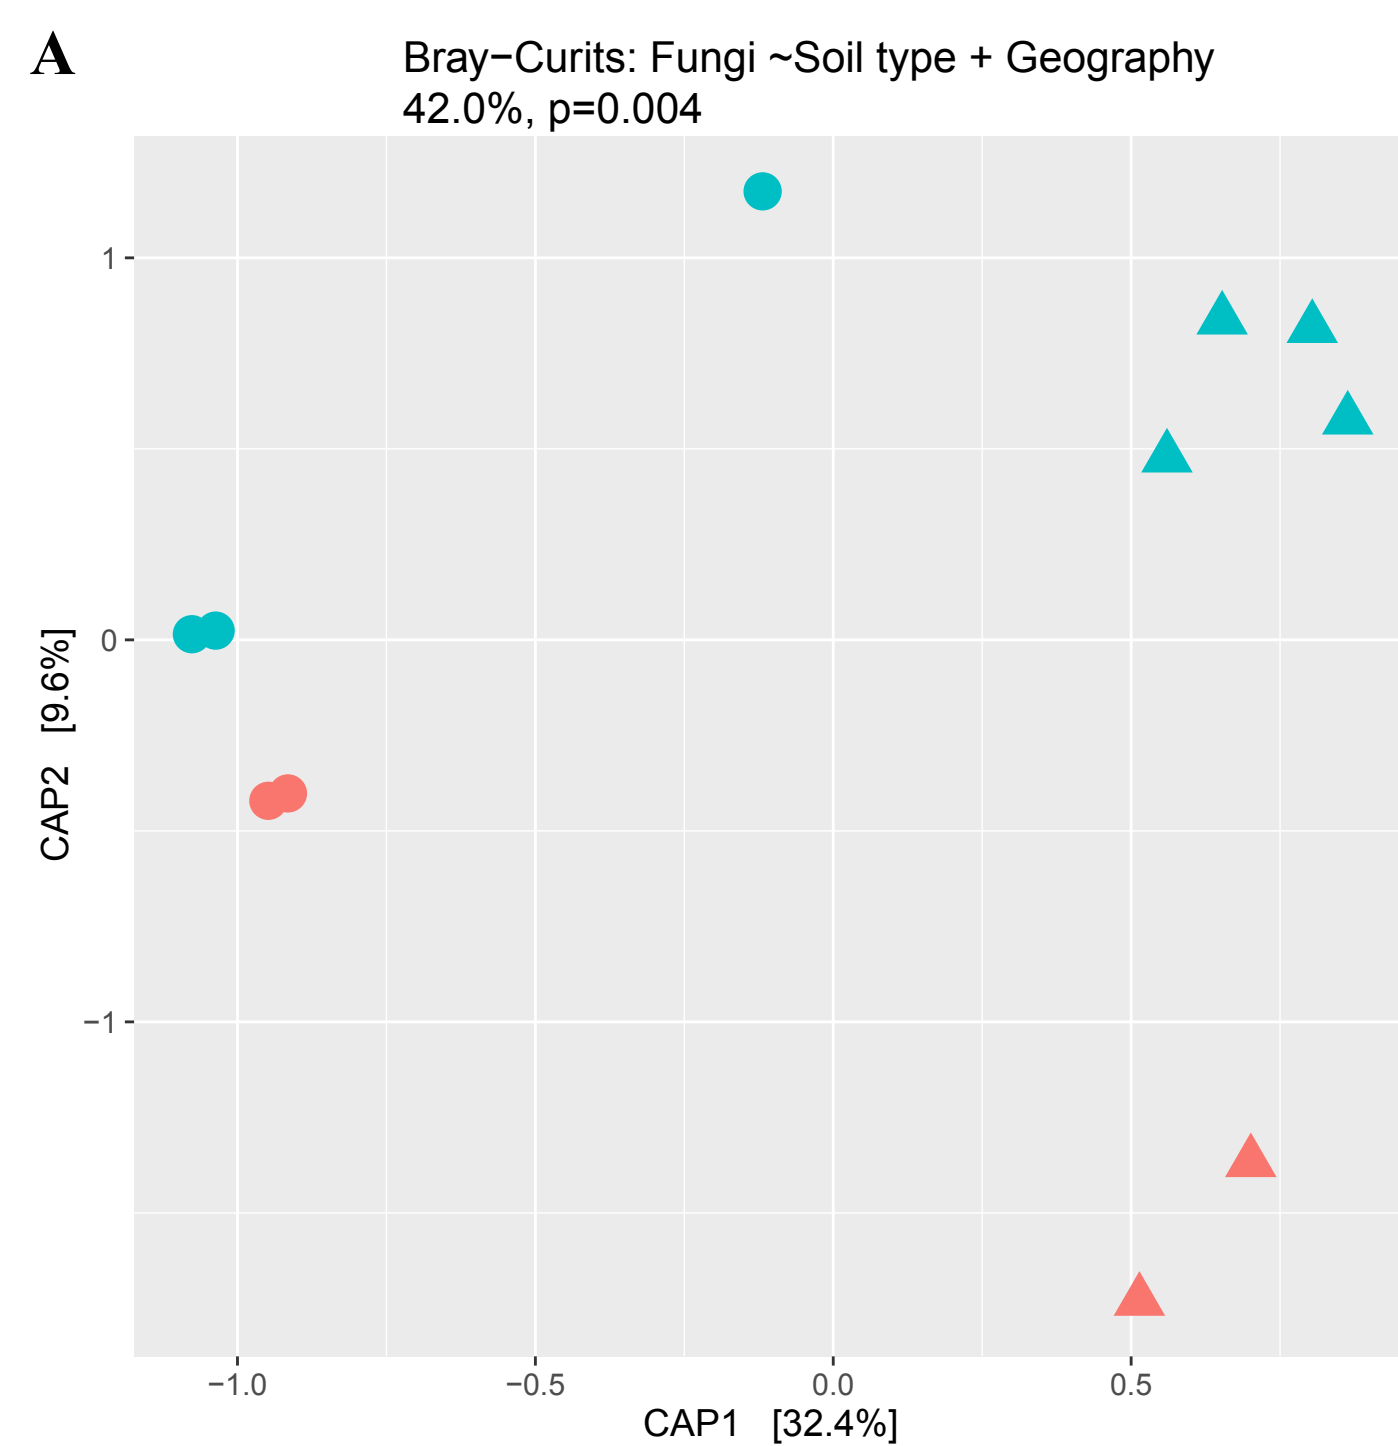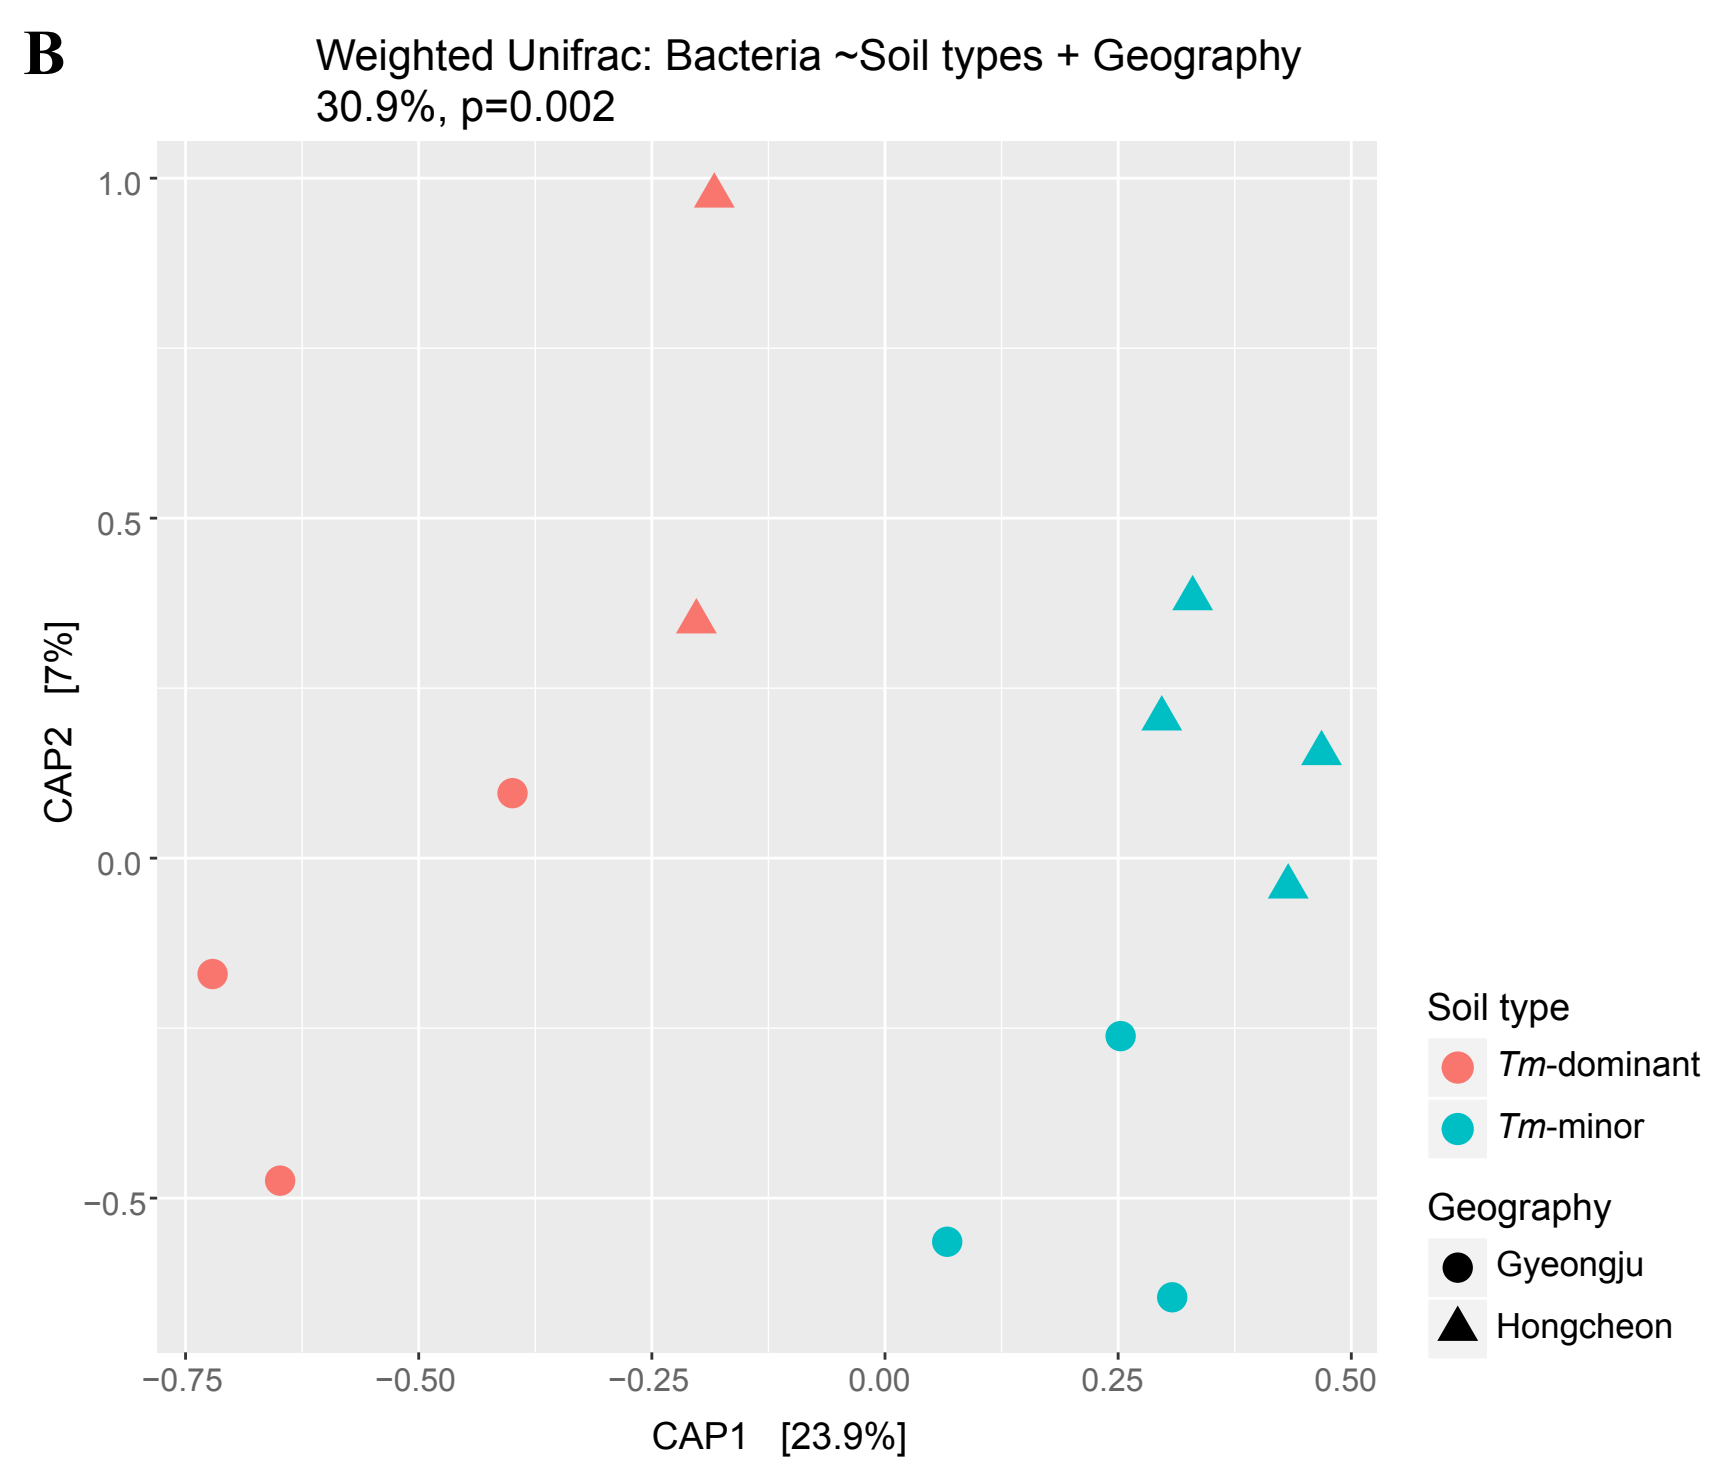

Supplement: S1 (10.1371/journal.pone.0168573.s001) [file journal.pone.0168573.s001]
